# Supplementary material for: Extracellular Vesicles from Uterine Aspirates Represent a Promising Source for Screening Markers of Gynecologic Cancers
Source: MDPI journal article supplement (doi:10.3390/cells11071064), 2022-03-22
Supplement: s1 [file s1]

## Supplementary

**Table S1.** Sequences of reverse transcription primers used; sequences of RT-qPCR primers and TaqMan™ probes used.

|                                          | Target               | Sequence 5'-3'                                          |
|------------------------------------------|----------------------|---------------------------------------------------------|
| Reverse Transcription primers            | miR-199a-3p RT       | GTCGTATCCAGTGCAGGGTCCGAGGTATTCGCACTGGATACGAC<br>taacca  |
|                                          | miR-375-3p RT        | GTCGTATCCAGTGCAGGGTCCGAGGTATTCGCACTGGATACGAC<br>tcacgc  |
|                                          | miR-451a RT          | GTCGTATCCAGTGCAGGGTCCGAGGTATTCGCACTGGATACGAC<br>aactcag |
|                                          | miR-23a-3p RT        | GTCGTATCCAGTGCAGGGTCCGAGGTATTCGCACTGGATACGAC<br>ggaaatc |
|                                          | let-7b-5p RT         | CTCAACTGGAGCTAGTTTCGTCGTAGGGCAGTTGAGAACCACAC            |
|                                          | miR-16-5p            | GTTGGCTCTGGTGCAGGGTCCGAGGTATTCGCACCAGAGCCAAC<br>cgccaa  |
| PCR Reverse primer                       | Uni-Ch-R             | GTGCAGGGTCCGAGGT                                        |
|                                          | R1 (only for let-7b) | CTGGAGCTAGTTTCGTCGTAG                                   |
| PCR Forward primers                      | miR-199a-3p F        | CAGCTGGGACAGTAGTCTGC                                    |
|                                          | miR-375-3p F         | CACGCATAAACAAGCAAGC                                     |
|                                          | miR-451a F           | CACGCATAAACC GTTACCA                                    |
|                                          | miR-23a-3p F         | ATCACATTGCCAGGGATT                                      |
|                                          | let-7b-5p F          | CAGCTGGGTGAGGTAGTAG                                     |
|                                          | miR-16-5p F          | GTTTGGTAGCAGCACGTAAATA                                  |
| PCR TaqMan probes with LNA modifications | miR-199a-3p P        | <b>FAM-CATTGGTTAGTCGTATC-BHQ1</b>                       |
|                                          | miR-375-3p P         | <b>FAM-CTCGCGTGAGTCGTATCC-BHQ1</b>                      |
|                                          | miR-451a P           | <b>FAM-TTACTGAGTTGTCTGTATCC-BHQ1</b>                    |
|                                          | miR-23a-3p P         | <b>FAM-CGCACTGGATACGACGAAATCC-BHQ1</b>                  |
|                                          | let-7b-5p P          | <b>HEX-GTTGTGTGGTTCTCAACTG-BHQ1</b>                     |
|                                          | miR-16-5p P          | <b>FAM-TTGGCGTTGGCTCTG-BHQ1</b>                         |

**Table S2.** Ct values and standard deviation of hsa-miR-451a, hsa-miR-199a-3p, hsa-miR-375-3p, hsa-miR23a-3p, hsa-miR16-5p, let-7b-5p levels obtained by RT-qPCR in EVs isolated from UA of EOC patients and healthy individuals.

| Sample | hsa-miR451a |      | hsa-miR375-3p |      | hsa-miR199a-3p |      | hsa-miR23a-3p |      | hsa-miR16-5p |      | let-7b-5p  |      |
|--------|-------------|------|---------------|------|----------------|------|---------------|------|--------------|------|------------|------|
|        | mean<br>Ct  | SD   | mean<br>Ct    | SD   | mean<br>Ct     | SD   | mean<br>Ct    | SD   | mean<br>Ct   | SD   | mean<br>Ct | SD   |
| N1     | 29.55       | 0.15 | 36.53         | 0.49 | 28.29          | 0.05 | 26.55         | 0.09 | 33.03        | 0.29 | 29.77      | 0.24 |
| N2     | 28.51       | 0.13 | 36.38         | 0.26 | 26.60          | 0.34 | 25.63         | 0.17 | 31.57        | 0.30 | 27.29      | 0.16 |
| N3     | 28.88       | 0.07 | 35.12         | 0.06 | 28.40          | 0.07 | 25.42         | 0.27 | 30.38        | 0.25 | 30.25      | 0.04 |
| N4     | 26.82       | 0.07 | 37.11         | 0.33 | 27.53          | 0.04 | 25.01         | 0.08 | 27.88        | 0.16 | 27.97      | 0.09 |
| N5     | 28.49       | 0.05 | 34.44         | 0.13 | 28.33          | 0.06 | 25.17         | 0.12 | 29.99        | 0.15 | 28.30      | 0.19 |
| T1     | 30.09       | 0.04 | 34.15         | 0.11 | 29.86          | 0.08 | 25.50         | 0.09 | 24.09        | 0.09 | 28.47      | 0.07 |
| T2     | 28.67       | 0.05 | 35.58         | 0.34 | 30.49          | 0.07 | 25.27         | 0.21 | 30.65        | 0.24 | 29.62      | 0.10 |
| T3     | 29.44       | 0.13 | 34.88         | 0.09 | 31.80          | 0.07 | 25.99         | 0.05 | 35.28        | 0.27 | 27.935     | 0.16 |
| T4     | 33.10       | 0.08 | 34.15         | 0.04 | 33.50          | 0.03 | 26.45         | 0.02 | 31.77        | 0.17 | 31.11      | 0.24 |
| T5     | 31.92       | 0.31 | 33.64         | 0.11 | 29.91          | 0.10 | 25.64         | 0.09 | 31.54        | 0.33 | 25.67      | 0.04 |
